# Supplementary material for: Development and Validation of a Smartphone Addiction Scale (SAS)
Source: PLoS One. 2013 Feb 27;8(2):e56936. doi: 10.1371/journal.pone.0056936 (PMC3584150; doi:10.1371/journal.pone.0056936)
Supplement: Table S1 — English Version of SAS. (XLSX) [file pone.0056936.s002.xlsx]

## Sheet: Sheet1
Table S1. English Version of SAS
Items		Strongly disagree	Disagree	Weakly disagree	Weakly agree	Agree	Strongly agree
1	Missing planned work due to smartphone use	1	2	3	4	5	6
2	Having a hard time concentrating in class, while doing assignments, or while working due to smartphone use	1	2	3	4	5	6
3	Experiencing lightheadedness or blurred vision due to excessive smartphone use	1	2	3	4	5	6
4	Feeling pain in the wrists or at the back of the neck while using a smartphone	1	2	3	4	5	6
5	Feeling tired and lacking adequate sleep due to excessive smartphone use	1	2	3	4	5	6
6	Feeling calm or cozy while using a smartphone	1	2	3	4	5	6
7	Feeling pleasant or excited while using a smartphone	1	2	3	4	5	6
8	Feeling confident while using a smartphone	1	2	3	4	5	6
9	Being able to get rid of stress with a smartphone	1	2	3	4	5	6
10	There is nothing more fun to do than using my smartphone.	1	2	3	4	5	6
11	My life would be empty without my smartphone.	1	2	3	4	5	6
12	Feeling most liberal while using a smartphone	1	2	3	4	5	6
13	Using a smartphone is the most fun thing to do.	1	2	3	4	5	6
14	Won’t be able to stand not having a smartphone	1	2	3	4	5	6
15	Feeling impatient and fretful when I am not holding my smartphone	1	2	3	4	5	6
16	Having my smartphone in my mind even when I am not using it	1	2	3	4	5	6
17	I will never give up using my smartphone even when my daily life is already greatly affected by it.	1	2	3	4	5	6
18	Getting irritated when bothered while using my smartphone	1	2	3	4	5	6
19	Bringing my smartphone to the toilet even when I am in a hurry to get there	1	2	3	4	5	6
20	Feeling great meeting more people via smartphone use	1	2	3	4	5	6
21	Feeling that my relationships with my smartphone buddies are more intimate than my relationships with my real-life friends	1	2	3	4	5	6
22	Not being able to use my smartphone would be as painful as losing a friend.	1	2	3	4	5	6
23	Feeling that my smartphone buddies understand me better than my real-life friends	1	2	3	4	5	6
24	Constantly checking my smartphone so as not to miss conversations between other people on Twitter or Facebook	1	2	3	4	5	6
25	Checking SNS (Social Networking Service) sites like Twitter or Facebook right after waking up	1	2	3	4	5	6
26	Preferring talking with my smartphone buddies to hanging out with my real-life friends or with the other members of my family	1	2	3	4	5	6
27	Preferring searching from my smartphone to asking other people	1	2	3	4	5	6
28	My fully charged battery does not last for one whole day.	1	2	3	4	5	6
29	Using my smartphone longer than I had intended	1	2	3	4	5	6
30	Feeling the urge to use my smartphone again right after I stopped using it	1	2	3	4	5	6
31	Having tried time and again to shorten my smartphone use time, but failing all the time	1	2	3	4	5	6
32	Always thinking that I should shorten my smartphone use time	1	2	3	4	5	6
33	The people around me tell me that I use my smartphone too much.	1	2	3	4	5	6
